# Supplementary material for: Facile synthesis of self-assemblies of ultrathin round Pd nanosheets or nanorings and their enhanced electrocatalytic activities
Source: Royal Society of Chemistry journal article supplement (doi:10.1039/c7ce00807d), 2017-01-01
Supplement: c7ce00807d1.pdf [file c7ce00807d1.pdf]

Electronic Supplementary Information

**Facile synthesis of self-assemblies of ultrathin round Pd nanosheets or nanorings and their enhanced electrocatalytic activities**

Huan Wang,<sup>a</sup> Xing He,<sup>a</sup> Yanxi Zhao,<sup>a</sup> Jinlin Li,<sup>a</sup> Tao Huang,<sup>\*a</sup> and Hanfan Liu<sup>ab</sup>

<sup>a</sup>*Key Laboratory of Catalysis and Material Science of the State Ethnic Affairs Commission & Ministry of Education, Hubei Province, College of Chemistry and Material Science, South-Central University for Nationalities, Wuhan 430074, China*

<sup>b</sup>*Institute of Chemistry, Chinese Academy of Science, Beijing 100080, China*

\*E-mail: [huangt208@163.com](mailto:huangt208@163.com)

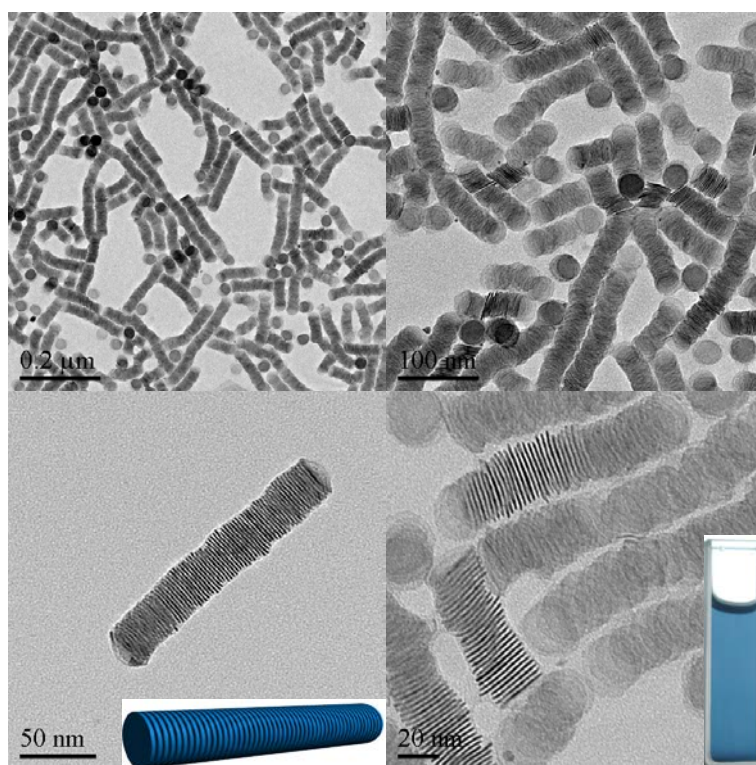

**Fig. S1** TEM image with different scales of the as-prepared self-assemblies of ultrathin round Pd nanosheets. The molar ratio of Pd(acac)<sub>2</sub>/PVP/KI/NaAc was 1/9/4/4 and the concentration of Pd(acac)<sub>2</sub> was 6.8mM

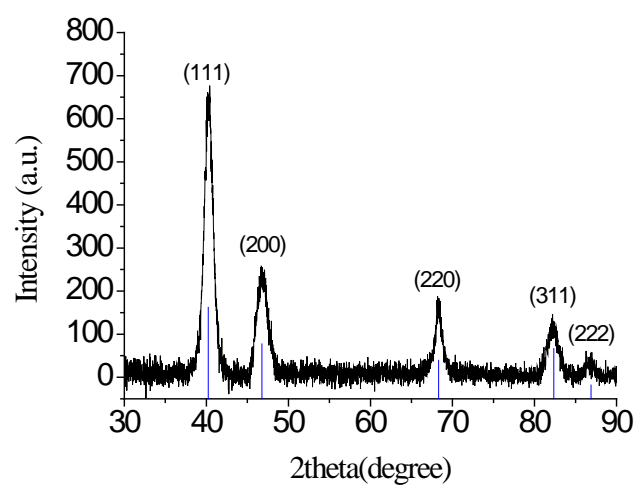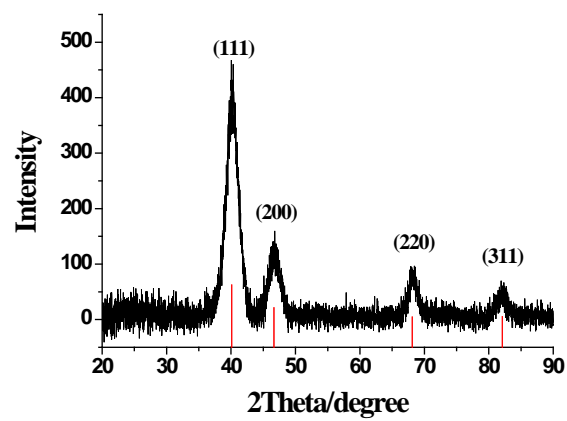

**Fig. S2** XRD patterns of the self-assemblies of round ultrathin Pd nanosheets

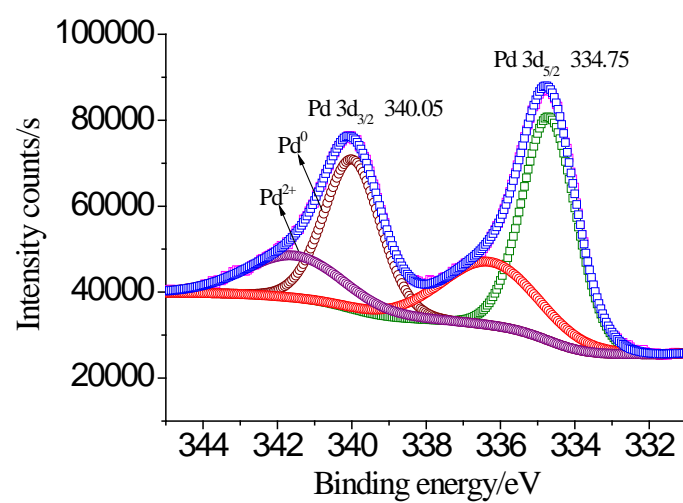

**Fig. S3** XPS spectrogram of the self-assemblies of round ultrathin Pd nanosheets

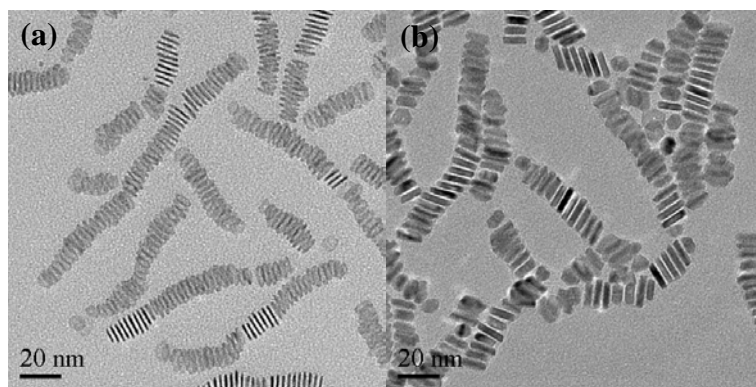

**Fig. S4** TEM images of Pd nanoparticles obtained at different temperatures. (a) 80°C; (b) 120°C

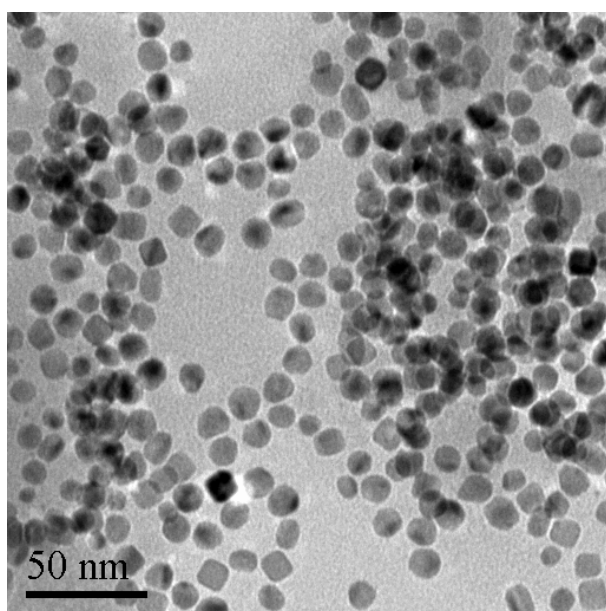

**Fig. 5S** TEM images of Pd nanoparicles prepared in the absence of CO.

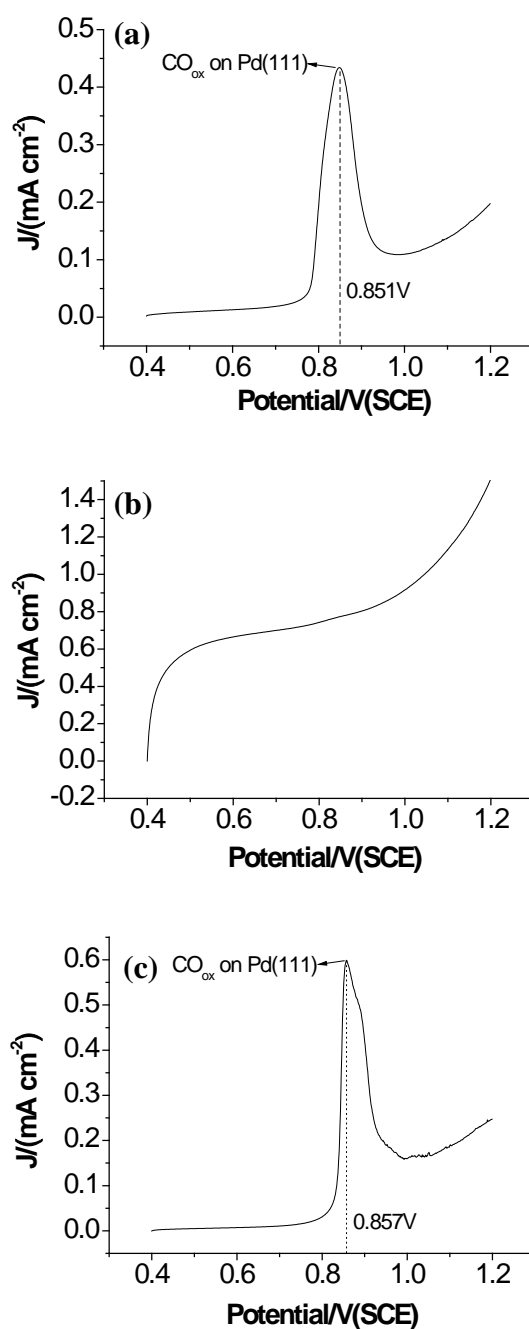

**Fig. S6** CO stripping voltammetry of the Pd nanosheet self-assemblies in 0.1 M H<sub>2</sub>SO<sub>4</sub> solution. (a) The freshly-prepared Pd nanosheet self-assemblies without introducing any additional CO; (b) the second potential scanning; (c) after dosing CO for 15 min for clean Pd nanosheet self-assemblies.

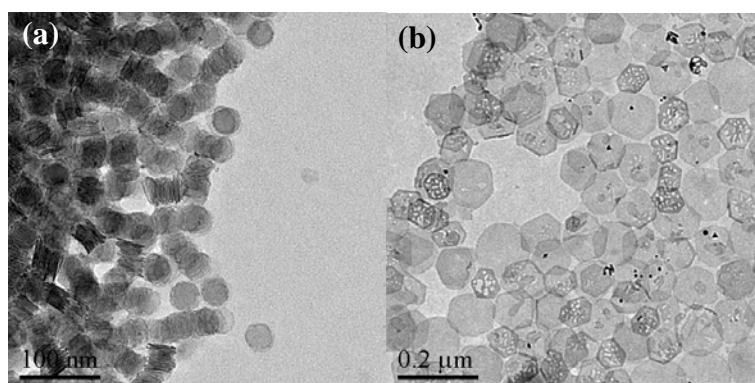

**Fig. S7** TEM images of the products prepared in the presence of sodium benzoate (a) or sodium oxalate (b) instead of sodium acetate.



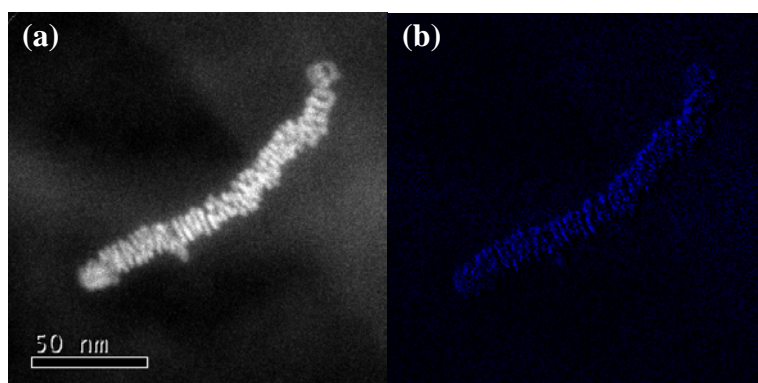

**Fig. S8** HAADT-STEM image (a) of a single Pd nanosheet self-assembly and the corresponding EDX mapping image of  $\Gamma$  ions (b).

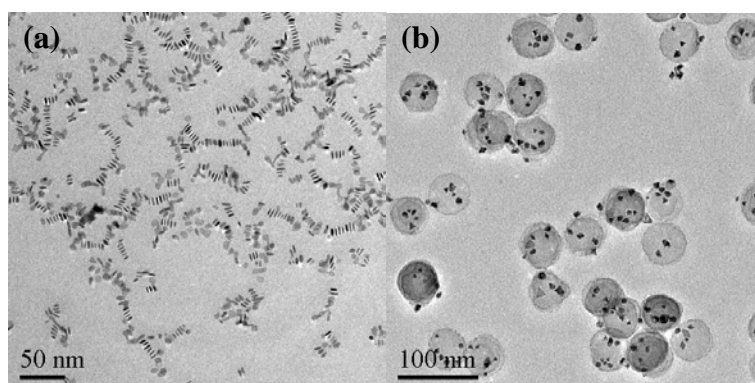

**Fig. S9** TEM images of the products obtained with adding different amount of KI. The molar ratio of Pd(acac)<sub>2</sub>/PVP/KI/NaAc: (a) 1/9/2/4; (b) 1/9/8/4.

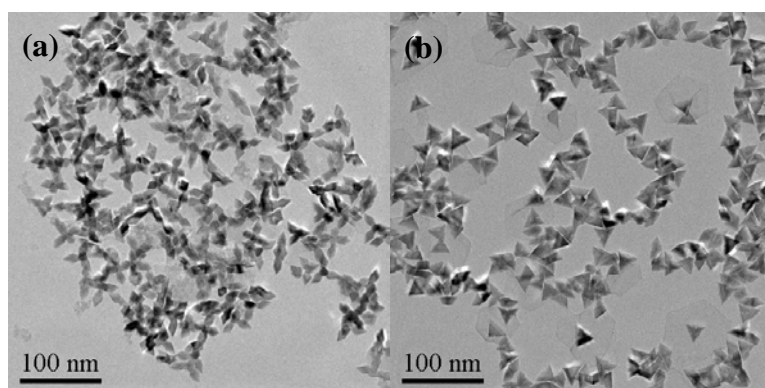

**Fig. S10** TEM images of the Pd nanocrystals with adding others halogen. (a) KCl; (b)KBr

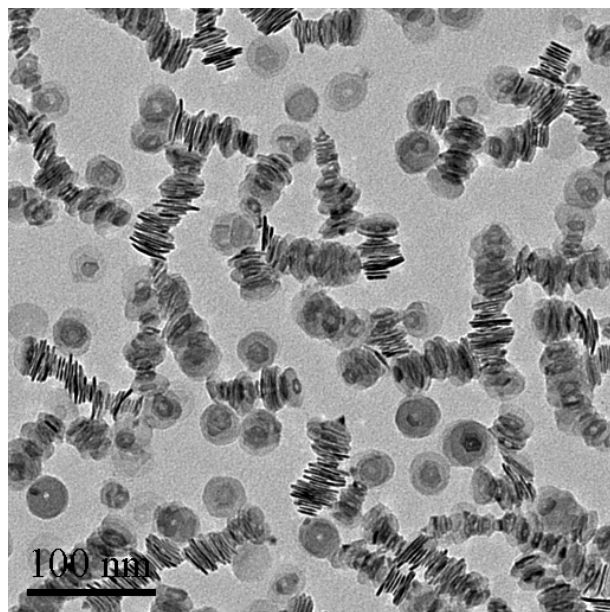

**Fig. S11** TEM image of the product prepared under CO reducing atmosphere at a reaction of 4 h.

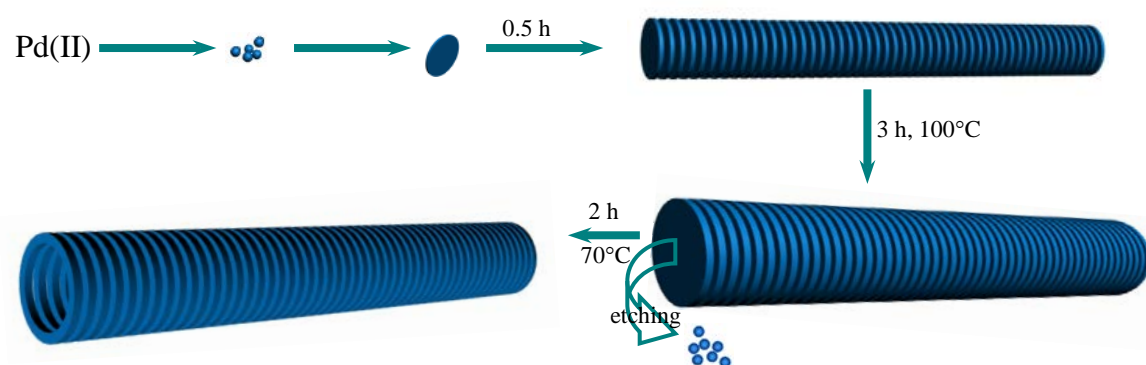

**Fig. S12** Schematic illustrations of the formation procedure and shape evolution of self-assemblies of ultrathin Pd nanosheets and nanorings.

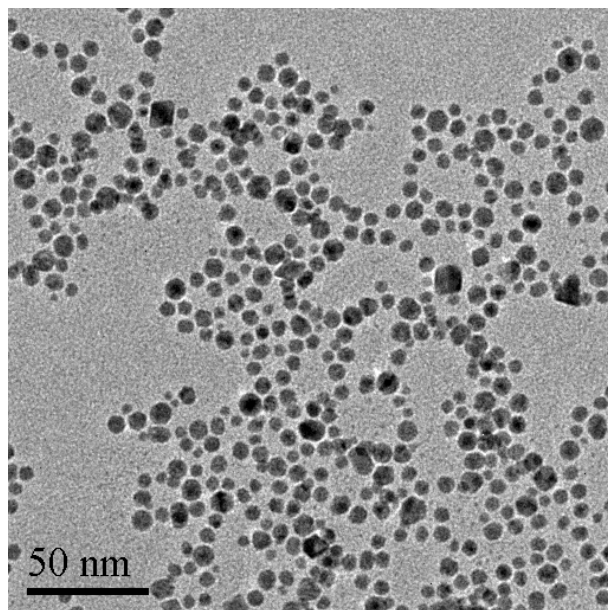

**Fig. S13** TEM image of small Pd nanoparticles. The mean size was 5 nm.

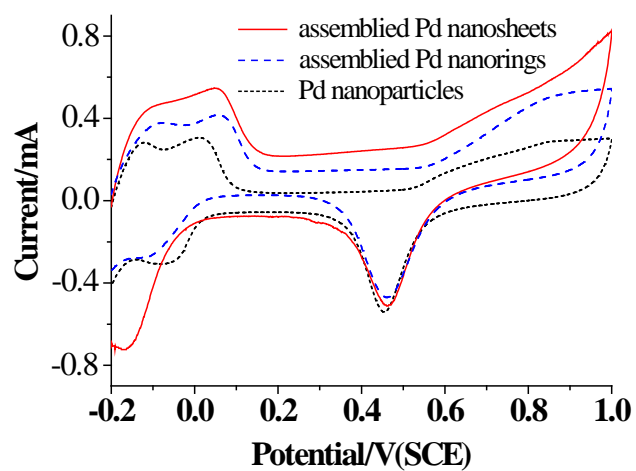

**Fig. S14** Cyclic voltammograms of different Pd catalysts in 0.5 M H<sub>2</sub>SO<sub>4</sub> + 0.5 M HCOOH solution at a scan rate of 50 mV·s<sup>-1</sup> between -0.2 and 1.0 V.

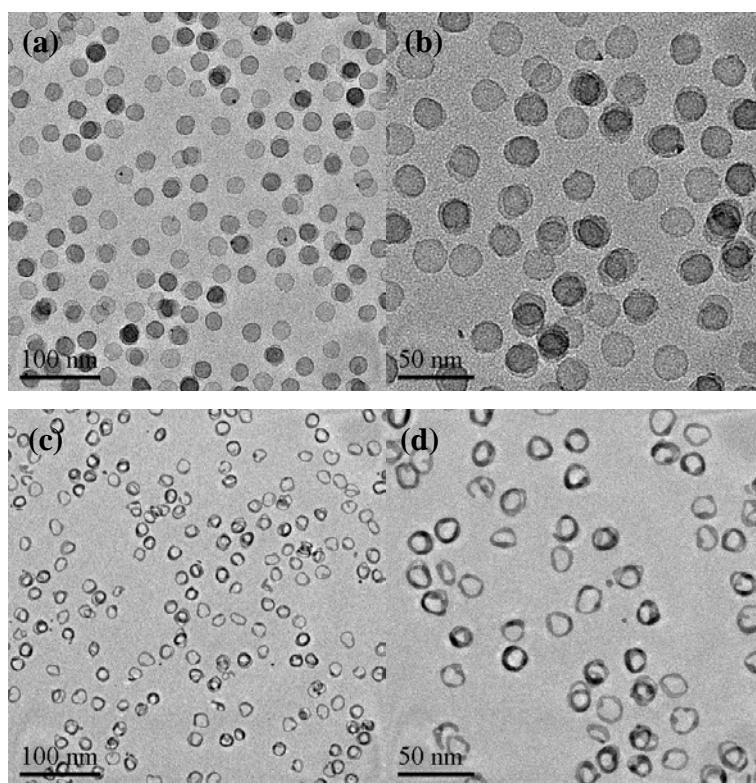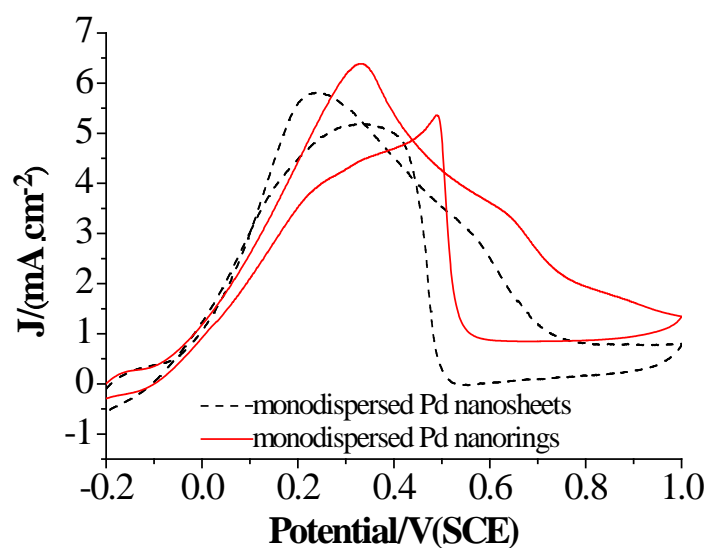

**Fig. S15** TEM images of monodispersed Pd nanosheets (a and b) and monodispersed Pd nanorings (c and d); (e) CV curves for the electrocatalytic oxidation of formic acid by the monodispersed Pd nanosheets, monodispersed Pd nanorings and Pd black. The formic acid oxidation was recorded in 0.5 M H<sub>2</sub>SO<sub>4</sub> solution at a scan rate of 50 mV·s<sup>-1</sup> between -0.2 and 1.0 V. The current densities were measured to be 6.41 mA·cm<sup>-2</sup> at 0.332 V on the monodispersed Pd nanorings and 5.82 mA·cm<sup>-2</sup> at 0.237 V on the monodispersed Pd, nanosheets, respectively.
